# Supplementary material
Source: PubMed Central journal article supplement (PMC4463199)
Supplement: JCI78490sd.pdf [file JCI78490sd.pdf]

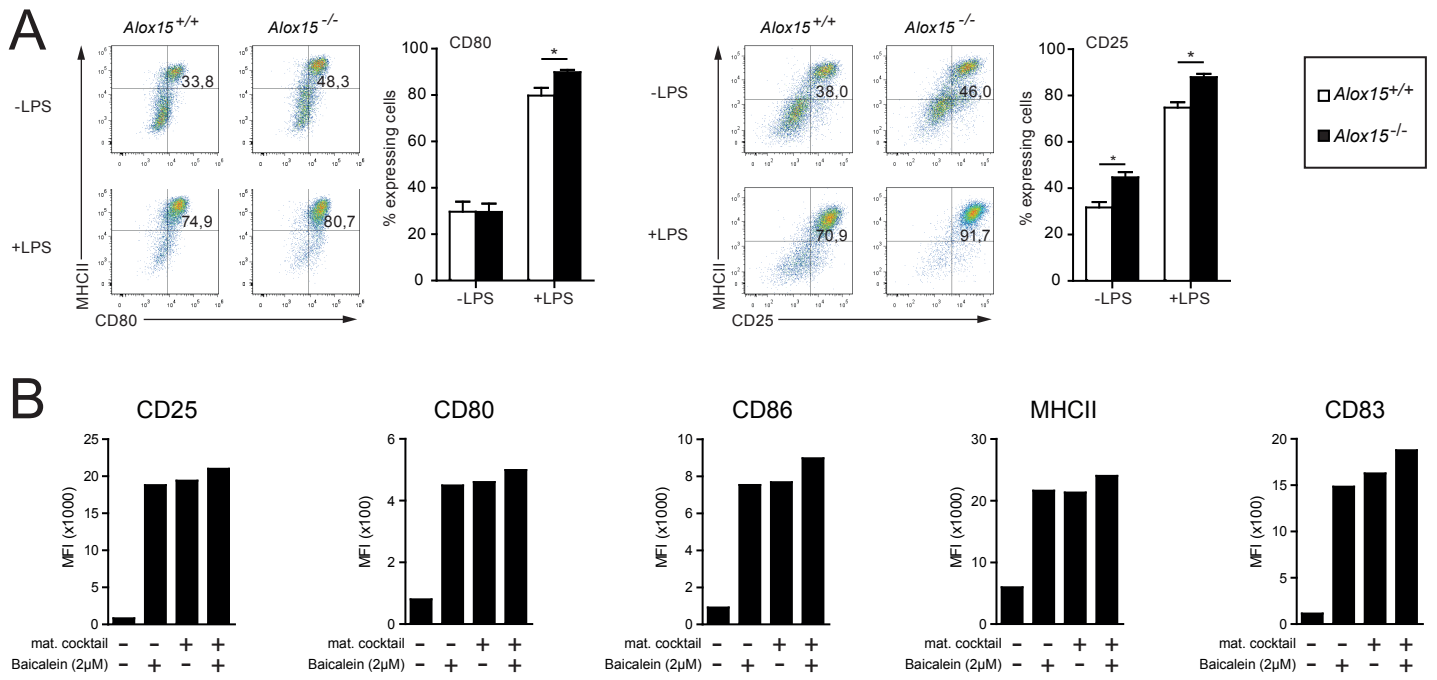

**Figure S1**

(A) Flow cytometric-based analysis of the expression of of the indicated co-stimulatory molecules or activation markers on wild-type (*Alox15*<sup>+/+</sup>) and *Alox15*<sup>-/-</sup> CD11c<sup>+</sup> bone marrow-derived dendritic cells (BMDCs) after LPS-induced maturation (100ng LPS/ml). (B) Effect of the 15-lipoxygenase inhibitor Baicalein on the expression of indicated surface molecules on human monocyte-derived DCs in the absence and presence of maturation cocktail. Data shown are representative for at least 3 independent experiments (n=3). Error bars represent SEM. \*p<0.05, \*\*p<0.005, Students *t* test.

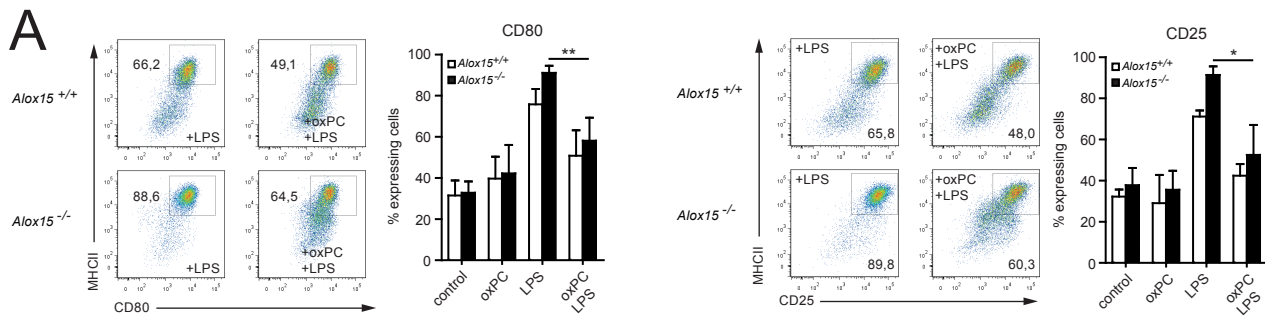

## Figure S2

**(A)** Flow-cytometric-based analysis of the expression of the indicated co-stimulatory molecules or activation markers on wild-type (*Alox15*<sup>+/+</sup>) and *Alox15*<sup>-/-</sup> CD11c<sup>+</sup> bone marrow-derived dendritic cells after LPS-induced maturation (100ng LPS/ml) in the absence and presence of oxydized phosphatidylcholine (oxPC) (50µg/ml). Data shown are representative for at least 3 independent experiments (n=3). Error bars represent SEM. \*p<0.05, \*\*p<0.005, Students *t* test.

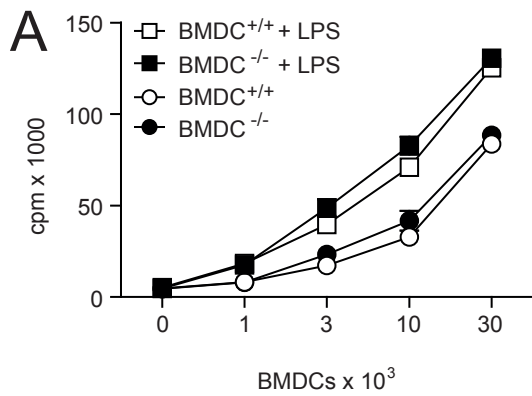

### Figure S3

(A) Measurement of T-cell proliferation by [methyl-3H] thymidine incorporation after allogeneic stimulation of BALB/c lymphocytes with immature or matured (LPS-treated) bone marrow-derived dendritic cells (BMDCs) isolated from wild-type (WT) and Alox15<sup>-/-</sup> mice (both C57BL/6 background). Data shown are representative for at least 3 independent experiments (n=3).

### Mixed lymphocyte reaction (MLR)

For the MLR, allogeneic lymphoid LN-T cells ( $4 \times 10^5$ /well) were incubated in 96-well cell culture plates with graded numbers of mature WT and Alox15<sup>-/-</sup> DCs for 5 days. The assay was performed in triplicates. Proliferation of T cells was monitored by measuring [methyl-3H]thymidine incorporation, added on day 4 of culture. Cells were pulsed with 1  $\mu$ Ci/well [methyl-3H]thymidine (Hartmann Analytik) for 16 h, harvested onto glass fiber filters (Printed Filtermat A; Wallac, Turcu, Finland) using an ICH-110 harvester (Inotech, Dottikon, Switzerland), and [methyl-3H]thymidine incorporation was determined using a microplate counter (Wallac).

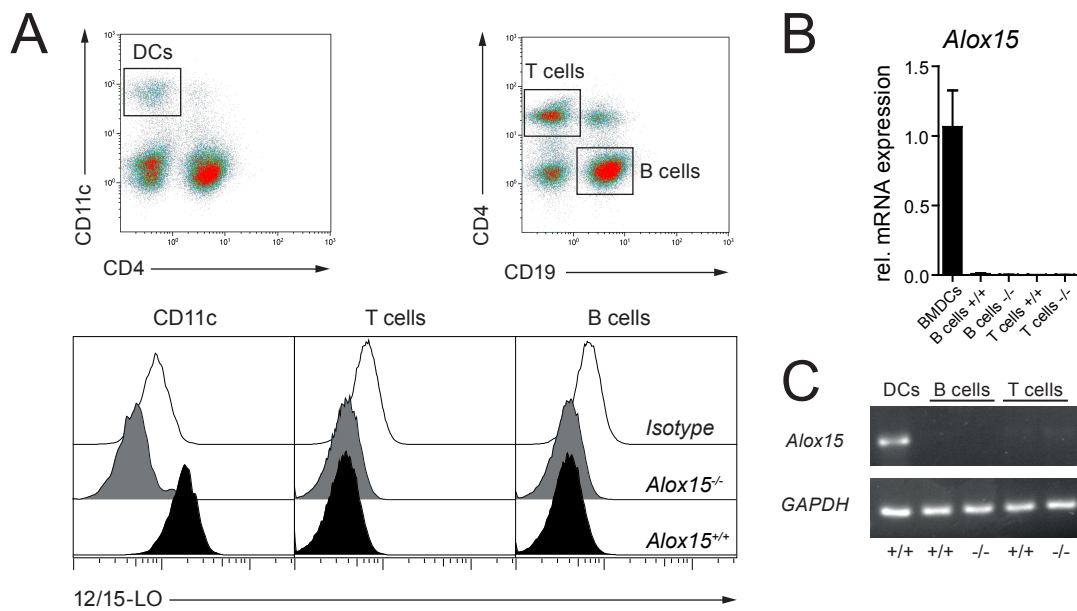

### Figure S4

(A) Flow-cytometric-based measurement of the 12/15-LO expression in splenocytes of naive wild-type ( $Alox15^{+/+}$ ) and  $Alox15^{-/-}$  mice. (B) Quantification of the  $Alox15$  mRNA expression levels in enriched  $CD19^+$  or  $CD4^+$  splenocytes isolated from naive wild-type (+/+) and  $Alox15^{-/-}$  (-/-) mice, compared to mRNA expression levels of wild-type bone marrow-derived DCs. (C) Agarose gel electrophoresis of the corresponding products of the performed real-time PCR of the  $Alox15$  and  $GAPDH$  genes in the indicated cell types. Data shown are representative for at least 3 independent experiments ( $n=3$ ).

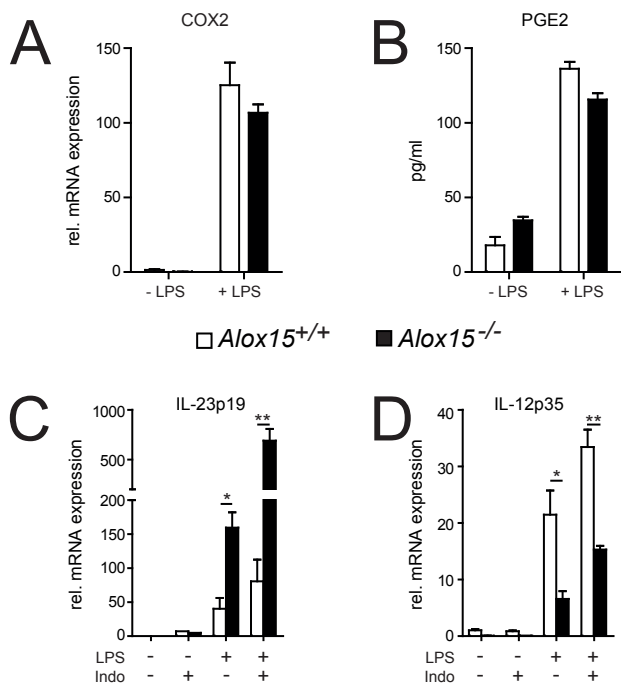

### Figure S5

(A) Real-time PCR-based quantification of mRNA expression levels of COX-2 and in (B) ELISA-based analysis of the PGE2 production by  $Alox15^{+/+}$  and  $Alox15^{-/-}$  CD11c<sup>+</sup> bone marrow-derived dendritic cells after LPS-induced maturation (100ng LPS/ml for 16 hours). (C) Effect of the Cyclooxygenase-2 inhibitor Indomethacin on the expression levels of the IL-23 specific subunit p19 and (D) the IL-12 specific subunit p35 in  $Alox15^{+/+}$  and  $Alox15^{-/-}$  CD11c<sup>+</sup> bone marrow-derived dendritic cells after LPS-induced maturation (100ng/ml) with or without pretreatment (4h) of the cells with 10 $\mu$ M Indomethacin. Data shown are representative for at least 3 independent experiments (n=3). Error bars represent SEM. \*p<0.05, \*\*p<0.005, Student's *t* test.
